# Supplementary material
Source: PubMed Central journal article supplement (PMC4418935)
Supplement: NIHMS677780-supplement-Appendix.pdf [file NIHMS677780-supplement-Appendix.pdf]

# THE LANCET Oncology

## Supplementary appendix

This appendix formed part of the original submission and has been peer reviewed. We post it as supplied by the authors.

Supplement to: Kwon ED, Drake CG, Scher HI, et al, for the CA184-043 Investigators. Ipilimumab versus placebo after radiotherapy in patients with metastatic castration-resistant prostate cancer that had progressed after docetaxel chemotherapy (CA184-043): a multicentre, randomised, double-blind, phase 3 trial. *Lancet Oncol* 2014; published online May 13. [http://dx.doi.org/10.1016/S1470-2045\(14\)70189-5](http://dx.doi.org/10.1016/S1470-2045(14)70189-5).

## Appendix

**Supplementary Table 1: Subsequent systemic anticancer treatments**

|                  | <b>Ipilimumab (n=393), %</b> | <b>Placebo (n=396), %</b> |
|------------------|------------------------------|---------------------------|
| Overall          | 41.0                         | 46.7                      |
| Abiraterone      | 21.1                         | 21.8                      |
| Cabazitaxel      | 13.0                         | 16.6                      |
| Docetaxel        | 6.0                          | 6.1                       |
| Mitoxantrone     | 6.1                          | 7.8                       |
| Carboplatin      | 3.0                          | 2.0                       |
| Cyclophosphamide | 2.5                          | 3.5                       |
| Enzalutamide     | 2.0                          | 1.3                       |

**Supplementary Table 2: Multivariate analysis of OS for baseline prognostic features\***

| <b>Prognostic feature</b>          | <b>Comparison</b>     | <b>P value**</b> | <b>HR (95% CI)</b> |
|------------------------------------|-----------------------|------------------|--------------------|
| Treatment                          | Ipilimumab vs placebo | 0.0408           | 0.81 (0.66–0.99)   |
| Age                                | ≥70 vs <70 years      | 0.0100           | 1.30 (1.07–1.60)   |
| Log (ALP)                          | Continuous variable   | <0.0001          | 1.40 (1.24–1.58)   |
| Log (PSA)                          | Continuous variable   | <0.0001          | 1.16 (1.08–1.24)   |
| Visceral metastases                | Yes vs No             | 0.0024           | 1.40 (1.13–1.73)   |
| Hemoglobin                         | ≥11 g/dL vs <11 g/dL  | <0.0001          | 0.54 (0.43–0.67)   |
| Average daily worst pain intensity | ≥4 vs <4              | 0.0030           | 1.37 (1.11–1.68)   |
| Bone regions with metastases       | ≥2 vs 1               | 0.0053           | 1.38 (1.10–1.73)   |

\*Sensitivity analysis of OS; the Cox regression multivariate model (intention-to-treat population) was pre-specified. A threshold  $\leq 0.1$  was used to determine if the pre-specified baseline feature was to be included in the model. No multiplicity adjustment.

\*\*For exploratory purposes only.

ALP, alkaline phosphatase.

**Supplementary Table 3: Prespecified secondary and exploratory endpoints**

| Endpoint               | Ipilimumab<br>(N = 399) | Placebo<br>(N = 400) | Hazard Ratio<br>(95% CI) | P Value  |
|------------------------|-------------------------|----------------------|--------------------------|----------|
| <b>Secondary</b>       |                         |                      |                          |          |
| PFS* (months)          | 4.0 (3.6–4.3)           | 3.1 (2.9–3.4)        | 0.70 (0.61–0.82)         | <0.0001† |
| Pain response‡ (%)     | 3.6 (1.44–7.18)         | 0.5 (0.01–2.96)      | NA                       |          |
| <b>Exploratory</b>     |                         |                      |                          |          |
| PSA response rate§ (%) | 13.1(9.5–17.5)          | 5.2 (3.0–8.4)        | NA                       |          |

\*PFS was a composite endpoint based on PSA progression, radiological progression, clinical deterioration, or death. PSA progression was defined as a PSA increase of  $\geq 25\%$  and  $\geq 2$  ng/ml above the nadir on or after week 12, confirmed over 2 subsequent assessments. Radiological progression was defined as progression in target, non-target (non-bone), or bone lesions on or after week 12 and confirmed by assessment performed at least 6 weeks later. Clinical deterioration was defined as a) persistent decrease in performance status (e.g., lasting  $>14$  days) of at least 2 points from baseline, attributable to disease progression; OR b) any symptomatic clinical event due to disease progression that indicated that the patient was not benefiting from study treatment AND could not be managed by supportive care (such as bisphosphonates and/or bone-directed RT); c) any change of antineoplastic therapy due to prostate cancer.

†Interpretation for descriptive purposes only.

‡Pain response was defined as a decrease in average daily worst pain intensity (Question #3 on the Brief Pain Inventory Short Form) by  $\geq 30\%$  from baseline, maintained over 2 consecutive assessments, without any rescue medication or increase in analgesic use in the same time period. Percentage shown as ratio of number of pain responders/number of pain evaluable patients; 7/197 and 1/186 in ipilimumab and placebo arms, respectively.

§PSA response was defined as a decrease from baseline of 50%, which was confirmed by a second PSA value 6 weeks later. PSA change from baseline was analyzed over time. Percentage shown as ratio of number of PSA responders/number of PSA response evaluable patients; 39/297 and 16/305 in ipilimumab and placebo arms, respectively.

NA=not applicable. PFS=progression-free survival. PSA=prostate-specific antigen.

**Supplementary Table 4: On-study adverse events**

|                                   | Ipilimumab (n=393) |            |           |           | Placebo (n=396) |            |           |           |
|-----------------------------------|--------------------|------------|-----------|-----------|-----------------|------------|-----------|-----------|
|                                   | Any grade          | Grade 3    | Grade 4   | Grade 5   | Any grade       | Grade 3    | Grade 4   | Grade 5   |
| <b>Any event*</b>                 | 385 (98.0)         | 190 (48.3) | 42 (10.7) | 66 (16.8) | 364 (91.9)      | 117 (29.5) | 45 (11.4) | 45 (11.4) |
| <b>Gastrointestinal disorders</b> | 285 (72.5)         | 85 (21.6)  | 6 (1.5)   | 3 (0.8)   | 224 (56.6)      | 33 (8.3)   | 0         | 0         |
| Diarrhea                          | 199 (50.6)         | 63 (16.0)  | 1 (0.3)   | 0         | 97 (24.5)       | 7 (1.8)    | 0         | 0         |
| Nausea                            | 127 (32.3)         | 11 (2.8)   | 0         | 0         | 106 (26.8)      | 7 (1.8)    | 0         | 0         |
| Vomiting                          | 111 (28.2)         | 7 (1.8)    | 0         | 0         | 85 (21.5)       | 9 (2.3)    | 0         | 0         |
| Constipation                      | 69 (17.6)          | 2 (0.5)    | 0         | 0         | 83 (21.0)       | 3 (0.8)    | 0         | 0         |
| Abdominal pain                    | 36 (9.2)           | 6 (1.5)    | 0         | 0         | 26 (6.6)        | 7 (1.8)    | 0         | 0         |
| Colitis                           | 27 (6.9)           | 15 (3.8)   | 3 (0.8)   | 0         | 3 (0.8)         | 0          | 0         | 0         |
| Abdominal pain (upper)            | 14 (3.6)           | 1 (0.3)    | 0         | 0         | 17 (4.3)        | 2 (0.5)    | 0         | 0         |
| Gastritis                         | 11 (2.8)           | 4 (1.0)    | 0         | 0         | 4 (1.0)         | 0          | 0         | 0         |
| Hemorrhoids                       | 8 (2.0)            | 0          | 0         | 0         | 8 (2.0)         | 1 (0.3)    | 0         | 0         |
| Abdominal distention              | 5 (1.3)            | 1 (0.3)    | 0         | 0         | 5 (1.3)         | 0          | 0         | 0         |
| Rectal hemorrhage                 | 3 (0.8)            | 0          | 0         | 0         | 5 (1.3)         | 1 (0.3)    | 0         | 0         |
| Ulcerative colitis                | 2 (0.5)            | 1 (0.3)    | 1 (0.3)   | 0         | 0               | 0          | 0         | 0         |
| Gastrointestinal disorder         | 2 (0.5)            | 1 (0.3)    | 0         | 0         | 0               | 0          | 0         | 0         |
| Gastrointestinal hemorrhage       | 2 (0.5)            | 0          | 0         | 1 (0.3)   | 0               | 0          | 0         | 0         |
| Intestinal hemorrhage             | 2 (0.5)            | 0          | 1 (0.3)   | 0         | 0               | 0          | 0         | 0         |
| Large intestine perforation       | 2 (0.5)            | 2 (0.5)    | 0         | 0         | 0               | 0          | 0         | 0         |
| Proctocolitis                     | 2 (0.5)            | 1 (0.3)    | 0         | 0         | 0               | 0          | 0         | 0         |
| Proctalgia                        | 1 (0.3)            | 0          | 0         | 0         | 2 (0.5)         | 1 (0.3)    | 0         | 0         |
| Diverticular perforation          | 1 (0.3)            | 0          | 0         | 1 (0.3)   | 0               | 0          | 0         | 0         |
| Abdominal tenderness              | 0                  | 0          | 0         | 0         | 1 (0.3)         | 1 (0.3)    | 0         | 0         |
| Diaphragmatic hernia              | 0                  | 0          | 0         | 0         | 1 (0.3)         | 1 (0.3)    | 0         | 0         |
| Fecaloma                          | 0                  | 0          | 0         | 0         | 1 (0.3)         | 1 (0.3)    | 0         | 0         |
| Femoral hernia, obstructive       | 0                  | 0          | 0         | 0         | 1 (0.3)         | 1 (0.3)    | 0         | 0         |
| Gastric ileus                     | 1 (0.3)            | 1 (0.3)    | 0         | 0         | 0               | 0          | 0         | 0         |
| Gastric ulcer                     | 1 (0.3)            | 1 (0.3)    | 0         | 0         | 0               | 0          | 0         | 0         |
| Gastric atrophic                  | 1 (0.3)            | 1 (0.3)    | 0         | 0         | 0               | 0          | 0         | 0         |
| Gastrointestinal obstruction      | 1 (0.3)            | 1 (0.3)    | 0         | 0         | 1 (0.3)         | 1 (0.3)    | 0         | 0         |

|                                                        |            |           |          |         |            |           |         |         |
|--------------------------------------------------------|------------|-----------|----------|---------|------------|-----------|---------|---------|
| Gastrointestinal pain                                  | 1 (0.3)    | 1 (0.3)   | 0        | 0       | 1 (0.3)    | 1 (0.3)   | 0       | 0       |
| Hematochezia                                           | 1 (0.3)    | 1 (0.3)   | 0        | 0       | 1 (0.3)    | 0         | 0       | 0       |
| Ileitis                                                | 1 (0.3)    | 1 (0.3)   | 0        | 0       | 0          | 0         | 0       | 0       |
| Intestinal obstruction                                 | 1 (0.3)    | 0         | 0        | 1 (0.3) | 1 (0.3)    | 1 (0.3)   | 0       | 0       |
| <b>General disorders</b>                               | 266 (67.7) | 74 (18.8) | 12 (3.1) | 7 (1.8) | 255 (64.4) | 65 (16.4) | 7 (1.8) | 7 (1.8) |
| Fatigue                                                | 150 (38.2) | 34 (8.7)  | 6 (1.5)  | 0       | 123 (31.1) | 31 (7.8)  | 4 (1.0) | 0       |
| Pyrexia                                                | 89 (22.6)  | 5 (1.3)   | 0        | 0       | 51 (12.9)  | 1 (0.3)   | 0       | 0       |
| Asthenia                                               | 82 (20.9)  | 25 (6.4)  | 1 (0.3)  | 0       | 68 (17.2)  | 12 (3.0)  | 1 (0.3) | 0       |
| Peripheral edema                                       | 51 (13.0)  | 0         | 0        | 0       | 37 (9.3)   | 2 (0.5)   | 0       | 0       |
| Pain                                                   | 37 (9.4)   | 8 (2.0)   | 2 (0.5)  | 0       | 49 (12.4)  | 15 (3.8)  | 2 (0.5) | 0       |
| General physical health deterioration                  | 19 (4.8)   | 12 (3.1)  | 2 (0.5)  | 3 (0.8) | 15 (3.8)   | 7 (1.8)   | 1 (0.3) | 2 (0.5) |
| Chest pain                                             | 15 (3.8)   | 1 (0.3)   | 0        | 0       | 18 (4.5)   | 2 (0.5)   | 0       | 0       |
| Malaise                                                | 13 (3.3)   | 4 (1.0)   | 0        | 0       | 3 (0.8)    | 0         | 0       | 0       |
| Mucosal inflammation                                   | 10 (2.5)   | 1 (0.3)   | 0        | 0       | 3 (0.8)    | 0         | 0       | 0       |
| Gait disturbance                                       | 7 (1.8)    | 2 (0.5)   | 1 (0.3)  | 0       | 3 (0.8)    | 0         | 0       | 0       |
| Performance status decreased                           | 6 (1.5)    | 2 (0.5)   | 0        | 0       | 5 (1.3)    | 3 (0.8)   | 0       | 0       |
| Spinal pain                                            | 6 (1.5)    | 2 (0.5)   | 0        | 0       | 10 (2.5)   | 2 (0.5)   | 0       | 0       |
| Death                                                  | 2 (0.5)    | 0         | 0        | 2 (0.5) | 1 (0.3)    | 0         | 0       | 1 (0.3) |
| Multi-organ failure                                    | 2 (0.5)    | 0         | 0        | 2 (0.5) | 4 (1.0)    | 0         | 0       | 4 (1.0) |
| Suprapubic pain                                        | 0          | 0         | 0        | 0       | 1 (0.3)    | 1 (0.3)   | 0       | 0       |
| <b>Skin and subcutaneous tissue disorders</b>          | 189 (48.1) | 6 (1.5)   | 0        | 0       | 72 (18.2)  | 0         | 0       | 0       |
| Pruritus                                               | 99 (25.2)  | 1 (0.3)   | 0        | 0       | 22 (5.6)   | 0         | 0       | 0       |
| Rash                                                   | 83 (21.1)  | 2 (0.5)   | 0        | 0       | 27 (6.8)   | 0         | 0       | 0       |
| Urticaria                                              | 10 (2.5)   | 1 (0.3)   | 0        | 0       | 1 (0.3)    | 0         | 0       | 0       |
| Erythema                                               | 9 (2.3)    | 1 (0.3)   | 0        | 0       | 1 (0.3)    | 0         | 0       | 0       |
| Rash generalized                                       | 5 (1.3)    | 1 (0.3)   | 0        | 0       | 0          | 0         | 0       | 0       |
| <b>Musculoskeletal and connective tissue disorders</b> | 176 (44.8) | 41 (10.4) | 0        | 0       | 213 (53.8) | 55 (13.9) | 3 (0.8) | 0       |
| Back pain                                              | 59 (15.0)  | 14 (3.6)  | 0        | 0       | 77 (19.4)  | 17 (4.3)  | 3 (0.8) | 0       |
| Arthralgia                                             | 44 (11.2)  | 6 (1.5)   | 0        | 0       | 58 (14.6)  | 7 (1.8)   | 0       | 0       |
| Bone pain                                              | 34 (8.7)   | 9 (2.3)   | 0        | 0       | 55 (13.9)  | 13 (3.3)  | 0       | 0       |
| Musculoskeletal pain                                   | 32 (8.1)   | 1 (0.3)   | 0        | 0       | 47 (11.9)  | 9 (2.3)   | 0       | 0       |
| Pain in extremity                                      | 32 (8.1)   | 4 (1.0)   | 0        | 0       | 43 (10.9)  | 9 (2.3)   | 0       | 0       |

|                                           |                   |                  |                |                |                   |                 |                |                |
|-------------------------------------------|-------------------|------------------|----------------|----------------|-------------------|-----------------|----------------|----------------|
| Muscular weakness                         | 18 (4.6)          | 8 (2.0)          | 0              | 0              | 16 (4.0)          | 4 (1.0)         | 0              | 0              |
| Myalgia                                   | 14 (3.6)          | 3 (0.8)          | 0              | 0              | 17 (4.3)          | 1 (0.3)         | 0              | 0              |
| Neck pain                                 | 13 (3.3)          | 0                | 0              | 0              | 10 (2.5)          | 2 (0.5)         | 0              | 0              |
| Groin pain                                | 7 (1.8)           | 0                | 0              | 0              | 5 (1.3)           | 2 (0.5)         | 0              | 0              |
| Musculoskeletal chest pain                | 5 (1.3)           | 2 (0.5)          | 0              | 0              | 19 (4.8)          | 2 (0.5)         | 0              | 0              |
| Flank pain                                | 3 (0.8)           | 1 (0.3)          | 0              | 0              | 6 (1.5)           | 2 (0.5)         | 0              | 0              |
| Osteonecrosis                             | 2 (0.5)           | 1 (0.3)          | 0              | 0              | 0                 | 0               | 0              | 0              |
| Myopathy                                  | 1 (0.3)           | 0                | 0              | 0              | 1 (0.3)           | 1 (0.3)         | 0              | 0              |
| <b>Metabolism and nutrition disorders</b> | <b>171 (43.5)</b> | <b>49 (12.5)</b> | <b>5 (1.3)</b> | <b>1 (0.3)</b> | <b>133 (33.6)</b> | <b>29 (7.3)</b> | <b>2 (0.5)</b> | <b>1 (0.3)</b> |
| Decreased appetite                        | 120 (30.5)        | 15 (3.8)         | 0              | 0              | 98 (24.7)         | 12 (3.0)        | 0              | 0              |
| Dehydration                               | 38 (9.7)          | 21 (5.3)         | 0              | 0              | 24 (6.1)          | 8 (2.0)         | 1 (0.3)        | 1 (0.3)        |
| Hypokalemia                               | 22 (5.6)          | 10 (2.5)         | 1 (0.3)        | 0              | 10 (2.5)          | 4 (1.0)         | 0              | 0              |
| Hypocalcemia                              | 14 (3.6)          | 2 (0.5)          | 2 (0.5)        | 0              | 7 (1.8)           | 1 (0.3)         | 0              | 0              |
| Hyponatremia                              | 13 (3.3)          | 7 (1.8)          | 0              | 0              | 4 (1.0)           | 2 (0.5)         | 0              | 0              |
| Hyperglycemia                             | 10 (2.5)          | 4 (1.0)          | 0              | 0              | 5 (1.3)           | 1 (0.3)         | 1 (0.3)        | 0              |
| Hypoalbuminemia                           | 7 (1.8)           | 1 (0.3)          | 0              | 0              | 2 (0.5)           | 0               | 0              | 0              |
| Hyperuricemia                             | 3 (0.8)           | 0                | 2 (0.5)        | 0              | 2 (0.5)           | 0               | 0              | 0              |
| Failure to thrive                         | 2 (0.5)           | 1 (0.3)          | 0              | 0              | 0                 | 0               | 0              | 0              |
| Hyperkalemia                              | 2 (0.5)           | 0                | 0              | 0              | 3 (0.8)           | 2 (0.5)         | 0              | 0              |
| Acidosis                                  | 1 (0.3)           | 1 (0.3)          | 0              | 0              | 1 (0.3)           | 1 (0.3)         | 0              | 0              |
| Cachexia                                  | 1 (0.3)           | 1 (0.3)          | 0              | 0              | 2 (0.5)           | 1 (0.3)         | 0              | 0              |
| Diabetes mellitus                         | 1 (0.3)           | 1 (0.3)          | 0              | 0              | 1 (0.3)           | 0               | 0              | 0              |
| Hypophosphatemia                          | 1 (0.3)           | 1 (0.3)          | 0              | 0              | 0                 | 0               | 0              | 0              |
| Tumor lysis syndrome                      | 1 (0.3)           | 0                | 0              | 1 (0.3)        | 0                 | 0               | 0              | 0              |
| <b>Investigations</b>                     | <b>166 (42.2)</b> | <b>53 (13.5)</b> | <b>6 (1.5)</b> | <b>0</b>       | <b>112 (28.3)</b> | <b>29 (7.3)</b> | <b>6 (1.5)</b> | <b>0</b>       |
| Weight decreased                          | 90 (22.9)         | 5 (1.3)          | 0              | 0              | 56 (14.1)         | 1 (0.3)         | 0              | 0              |
| Aspartate aminotransferase increased      | 36 (9.2)          | 12 (3.1)         | 2 (0.5)        | 0              | 21 (5.3)          | 6 (1.5)         | 1 (0.3)        | 0              |
| Hemoglobin decreased                      | 34 (8.7)          | 10 (2.5)         | 3 (0.8)        | 0              | 23 (5.8)          | 8 (2.0)         | 1 (0.3)        | 0              |
| Alanine aminotransferase increased        | 29 (7.4)          | 9 (2.3)          | 0              | 0              | 9 (2.3)           | 3 (0.8)         | 0              | 0              |
| Blood creatinine increased                | 15 (3.8)          | 5 (1.3)          | 0              | 0              | 10 (2.5)          | 1 (0.3)         | 0              | 0              |
| Blood alkaline phosphatase increased      | 14 (3.6)          | 7 (1.8)          | 0              | 0              | 12 (3.0)          | 4 (1.0)         | 1 (0.3)        | 0              |
| Blood albumin decreased                   | 8 (2.0)           | 1 (0.3)          | 0              | 0              | 2 (0.5)           | 0               | 0              | 0              |
| Platelet count decreased                  | 8 (2.0)           | 3 (0.8)          | 0              | 0              | 5 (1.3)           | 1 (0.3)         | 1 (0.3)        | 0              |

|                                          |                   |                 |                |                |                   |                 |                |                |
|------------------------------------------|-------------------|-----------------|----------------|----------------|-------------------|-----------------|----------------|----------------|
| Blood bilirubin increased                | 6 (1.5)           | 4 (1.0)         | 0              | 0              | 1 (0.3)           | 0               | 0              | 0              |
| Blood lactate dehydrogenase increased    | 6 (1.5)           | 1 (0.3)         | 0              | 0              | 6 (1.5)           | 0               | 0              | 0              |
| Blood potassium decreased                | 6 (1.5)           | 1 (0.3)         | 0              | 0              | 0                 | 0               | 0              | 0              |
| Blood phosphorous decreased              | 5 (1.3)           | 2 (0.5)         | 0              | 0              | 3 (0.8)           | 1 (0.3)         | 0              | 0              |
| Liver function test abnormal             | 5 (1.3)           | 4 (1.0)         | 0              | 0              | 1 (0.3)           | 1 (0.3)         | 0              | 0              |
| Blood sodium decreased                   | 4 (1.0)           | 1 (0.3)         | 0              | 0              | 1 (0.3)           | 1 (0.3)         | 0              | 0              |
| Blood calcium decreased                  | 3 (0.8)           | 2 (0.5)         | 0              | 0              | 4 (1.0)           | 0               | 0              | 0              |
| Blood glucose increased                  | 3 (0.8)           | 1(0.3)          | 0              | 0              | 2 (0.5)           | 1 (0.3)         | 0              | 0              |
| C-reactive protein increased             | 3 (0.8)           | 1(0.3)          | 0              | 0              | 0                 | 0               | 0              | 0              |
| Gamma-glutamyltransferase increased      | 3 (0.8)           | 1(0.3)          | 0              | 0              | 1 (0.3)           | 0               | 0              | 0              |
| Lipase increased                         | 3 (0.8)           | 0               | 1 (0.3)        | 0              | 3 (0.8)           | 2 (0.5)         | 0              | 0              |
| Red blood cell count decreased           | 3 (0.8)           | 0               | 0              | 0              | 1 (0.3)           | 1 (0.3)         | 0              | 0              |
| Amylase increased                        | 2 (0.5)           | 2 (0.5)         | 0              | 0              | 1 (0.3)           | 0               | 0              | 0              |
| Blood corticotrophin decreased           | 2 (0.5)           | 1 (0.3)         | 0              | 0              | 2 (0.5)           | 0               | 0              | 0              |
| Blood creatine phosphokinase decreased   | 1 (0.3)           | 1 (0.3)         | 0              | 0              | 0                 | 0               | 0              | 0              |
| International normalized ratio increased | 1 (0.3)           | 1 (0.3)         | 0              | 0              | 2 (0.5)           | 1 (0.3)         | 0              | 0              |
| Thyroid function test abnormal           | 1 (0.3)           | 1 (0.3)         | 0              | 0              | 0                 | 0               | 0              | 0              |
| White blood cell count decreased         | 1 (0.3)           | 0               | 0              | 0              | 1 (0.3)           | 1 (0.3)         | 0              | 0              |
| General physical condition abnormal      | 1 (0.3)           | 0               | 0              | 0              | 3 (0.8)           | 2 (0.5)         | 0              | 0              |
| ECOG performance status worsened         | 0                 | 0               | 0              | 0              | 2 (0.5)           | 1 (0.3)         | 1 (0.3)        | 0              |
| Neutrophil count decreased               | 0                 | 0               | 0              | 0              | 2 (0.5)           | 0               | 1 (0.3)        | 0              |
| Heart rate irregular                     | 0                 | 0               | 0              | 0              | 1 (0.3)           | 1 (0.3)         | 0              | 0              |
| <b>Nervous system disorders</b>          | <b>128 (32.6)</b> | <b>19 (4.8)</b> | <b>7 (1.8)</b> | <b>1 (0.3)</b> | <b>126 (31.8)</b> | <b>26 (6.6)</b> | <b>5 (1.3)</b> | <b>3 (0.8)</b> |
| Headache                                 | 39 (9.9)          | 2 (0.5)         | 0              | 0              | 32 (8.1)          | 2 (0.5)         | 0              | 0              |
| Dizziness                                | 23 (5.9)          | 1 (0.3)         | 0              | 0              | 18 (4.5)          | 1 (0.3)         | 0              | 0              |
| Paraesthesia                             | 11 (2.8)          | 1 (0.3)         | 0              | 0              | 10 (2.5)          | 1 (0.3)         | 0              | 0              |
| Somnolence                               | 11 (2.8)          | 1 (0.3)         | 0              | 0              | 5 (1.3)           | 2 (0.5)         | 0              | 0              |
| Syncope                                  | 7 (1.8)           | 4 (1.0)         | 0              | 0              | 3 (0.8)           | 3 (0.8)         | 0              | 0              |
| Peripheral motor neuropathy              | 6 (1.5)           | 3 (0.8)         | 0              | 0              | 4 (1.0)           | 3 (0.8)         | 0              | 0              |
| Spinal cord compression                  | 5 (1.3)           | 3 (0.8)         | 1 (0.3)        | 0              | 4 (1.0)           | 3 (0.8)         | 0              | 0              |
| Peripheral neuropathy                    | 5 (1.3)           | 0               | 0              | 0              | 8 (2.0)           | 1 (0.3)         | 0              | 0              |
| Lethargy                                 | 4 (1.0)           | 2 (0.5)         | 0              | 0              | 5 (1.3)           | 2 (0.5)         | 0              | 0              |
| Cerebrovascular accident                 | 3 (0.8)           | 0               | 2 (0.5)        | 1 (0.3)        | 2 (0.5)           | 0               | 1 (0.3)        | 0              |



|                                    |                   |                 |                |                |                  |                 |                |                |
|------------------------------------|-------------------|-----------------|----------------|----------------|------------------|-----------------|----------------|----------------|
| Cognitive disorder                 | 3 (0.8)           | 2 (0.5)         | 0              | 0              | 1 (0.3)          | 0               | 0              | 0              |
| Intracranial/cerebral hemorrhage   | 2 (0.5)           | 0               | 2 (0.5)        | 0              | 1 (0.3)          | 1 (0.3)         | 0              | 0              |
| Presyncope                         | 2 (0.5)           | 1 (0.3)         | 0              | 0              | 1 (0.3)          | 1 (0.3)         | 0              | 0              |
| Convulsion                         | 2 (0.5)           | 0               | 0              | 0              | 2 (0.5)          | 1 (0.3)         | 0              | 0              |
| Cerebral ischemia                  | 1 (0.3)           | 1 (0.3)         | 0              | 0              | 0                | 0               | 0              | 0              |
| Motor dysfunction                  | 1 (0.3)           | 1 (0.3)         | 0              | 0              | 0                | 0               | 0              | 0              |
| Neuritis                           | 1 (0.3)           | 0               | 1 (0.3)        | 0              | 0                | 0               | 0              | 0              |
| Paraparesis                        | 1 (0.3)           | 0               | 1 (0.3)        | 0              | 2 (0.5)          | 1 (0.3)         | 0              | 0              |
| Paresis                            | 1 (0.3)           | 0               | 0              | 0              | 4 (1.0)          | 2 (0.5)         | 0              | 0              |
| Speech disorder                    | 1 (0.3)           | 0               | 0              | 0              | 2 (0.5)          | 1 (0.3)         | 0              | 0              |
| CNS hemorrhage                     | 0                 | 0               | 0              | 0              | 2 (0.5)          | 0               | 0              | 2 (0.5)        |
| Cerebral infarction                | 0                 | 0               | 0              | 0              | 2 (0.5)          | 1 (0.3)         | 0              | 0              |
| Ataxia                             | 0                 | 0               | 0              | 0              | 2 (0.5)          | 1 (0.3)         | 0              | 0              |
| Cerebrovascular disorder           | 0                 | 0               | 0              | 0              | 1 (0.3)          | 0               | 0              | 1 (0.3)        |
| Brachial plexopathy                | 0                 | 0               | 0              | 0              | 1 (0.3)          | 0               | 1 (0.3)        | 0              |
| Neurological symptom               | 0                 | 0               | 0              | 0              | 1 (0.3)          | 0               | 1 (0.3)        | 0              |
| Paraplegia                         | 0                 | 0               | 0              | 0              | 1 (0.3)          | 0               | 1 (0.3)        | 0              |
| Subarachnoid hemorrhage            | 0                 | 0               | 0              | 0              | 1 (0.3)          | 0               | 1 (0.3)        | 0              |
| Transient ischemic attack          | 0                 | 0               | 0              | 0              | 1 (0.3)          | 0               | 1 (0.3)        | 0              |
| Trigeminal nerve disorder          | 0                 | 0               | 0              | 0              | 1 (0.3)          | 1 (0.3)         | 0              | 0              |
| Loss of consciousness              | 0                 | 0               | 0              | 0              | 1 (0.3)          | 1 (0.3)         | 0              | 0              |
| <b>Infections and infestations</b> | <b>123 (31.3)</b> | <b>36 (9.2)</b> | <b>4 (1.0)</b> | <b>7 (1.8)</b> | <b>94 (23.7)</b> | <b>14 (3.5)</b> | <b>6 (1.5)</b> | <b>2 (0.5)</b> |
| Urinary tract infection            | 31 (7.9)          | 12 (3.1)        | 1 (0.3)        | 0              | 27 (6.8)         | 4 (1.0)         | 0              | 0              |
| Pneumonia                          | 24 (6.1)          | 11 (2.8)        | 1 (0.3)        | 4 (1.0)        | 9 (2.3)          | 2 (0.5)         | 1 (0.3)        | 0              |
| Infection                          | 8 (2.0)           | 3 (0.8)         | 0              | 0              | 8 (2.0)          | 3 (0.8)         | 0              | 0              |
| Oral candidiasis                   | 8 (2.0)           | 1 (0.3)         | 0              | 0              | 3 (0.8)          | 0               | 0              | 0              |
| Cystitis                           | 6 (1.5)           | 0               | 1 (0.3)        | 0              | 3 (0.8)          | 1 (0.3)         | 0              | 0              |
| Herpes zoster                      | 6 (1.5)           | 1 (0.3)         | 0              | 0              | 2 (0.5)          | 1 (0.3)         | 0              | 0              |
| Sepsis                             | 5 (1.3)           | 3 (0.8)         | 0              | 2 (0.5)        | 3 (0.8)          | 1 (0.3)         | 1 (0.3)        | 1 (0.3)        |
| Cellulitis                         | 3 (0.8)           | 0               | 0              | 1 (0.3)        | 3 (0.8)          | 1 (0.3)         | 1 (0.3)        | 0              |
| Lower respiratory tract infection  | 3 (0.8)           | 1 (0.3)         | 0              | 0              | 3 (0.8)          | 0               | 0              | 0              |
| Respiratory tract infection        | 3 (0.8)           | 2 (0.5)         | 0              | 0              | 3 (0.8)          | 2 (0.5)         | 0              | 0              |
| Device-related infection           | 2 (0.5)           | 1 (0.3)         | 0              | 0              | 0                | 0               | 0              | 0              |

|                                                         |                   |                 |                |                |                  |                |                |                |
|---------------------------------------------------------|-------------------|-----------------|----------------|----------------|------------------|----------------|----------------|----------------|
| Gastroenteritis                                         | 2 (0.5)           | 1 (0.3)         | 0              | 0              | 0                | 0              | 0              | 0              |
| Gastroenteritis viral                                   | 0                 | 0               | 0              | 0              | 1 (0.3)          | 0              | 0              | 0              |
| Subcutaneous abscess                                    | 2 (0.5)           | 1 (0.3)         | 0              | 0              | 0                | 0              | 0              | 0              |
| Clostridium difficile colitis                           | 1 (0.3)           | 1 (0.3)         | 0              | 0              | 0                | 0              | 0              | 0              |
| Epstein-Barr virus infection                            | 1 (0.3)           | 0               | 1 (0.3)        | 0              | 0                | 0              | 0              | 0              |
| Lung infection                                          | 1 (0.3)           | 1 (0.3)         | 0              | 0              | 0                | 0              | 0              | 0              |
| Periorbital cellulitis                                  | 1 (0.3)           | 1 (0.3)         | 0              | 0              | 0                | 0              | 0              | 0              |
| Peritonitis                                             | 1 (0.3)           | 0               | 1 (0.3)        | 0              | 0                | 0              | 0              | 0              |
| Septic shock                                            | 1 (0.3)           | 0               | 0              | 1 (0.3)        | 0                | 0              | 0              | 0              |
| Streptococcal bacteremia                                | 1 (0.3)           | 1 (0.3)         | 0              | 0              | 0                | 0              | 0              | 0              |
| Lobar pneumonia                                         | 1 (0.3)           | 0               | 0              | 0              | 1 (0.3)          | 0              | 1 (0.3)        | 0              |
| Bronchopneumonia                                        | 0                 | 0               | 0              | 0              | 3 (0.8)          | 0              | 0              | 1 (0.3)        |
| Cavernous sinus thrombosis                              | 0                 | 0               | 0              | 0              | 1 (0.3)          | 0              | 1 (0.3)        | 0              |
| Central nervous system infection                        | 0                 | 0               | 0              | 0              | 1 (0.3)          | 0              | 1 (0.3)        | 0              |
| Bacterial sepsis                                        | 0                 | 0               | 0              | 0              | 1 (0.3)          | 1 (0.3)        | 0              | 0              |
| Enterocolitis infectious                                | 0                 | 0               | 0              | 0              | 1 (0.3)          | 1 (0.3)        | 0              | 0              |
| Myelitis                                                | 0                 | 0               | 0              | 0              | 1 (0.3)          | 1 (0.3)        | 0              | 0              |
| Urosepsis                                               | 0                 | 0               | 0              | 0              | 1 (0.3)          | 1 (0.3)        | 0              | 0              |
| <b>Respiratory, thoracic, and mediastinal disorders</b> | <b>111 (28.2)</b> | <b>22 (5.6)</b> | <b>4 (1.0)</b> | <b>6 (1.5)</b> | <b>80 (20.2)</b> | <b>9 (2.3)</b> | <b>7 (1.8)</b> | <b>3 (0.8)</b> |
| Dyspnea                                                 | 50 (12.7)         | 15 (3.8)        | 3 (0.8)        | 0              | 36 (9.1)         | 5 (1.3)        | 2 (0.5)        | 0              |
| Cough                                                   | 36 (9.2)          | 2 (0.5)         | 0              | 0              | 27 (6.8)         | 0              | 0              | 0              |
| Pleural effusion                                        | 11 (2.8)          | 2 (0.5)         | 0              | 1 (0.5)        | 11 (2.8)         | 1 (0.3)        | 1 (0.3)        | 0              |
| Oropharyngeal pain                                      | 7 (1.8)           | 1 (0.3)         | 0              | 0              | 3 (0.8)          | 0              | 0              | 0              |
| Pneumonitis                                             | 5 (1.3)           | 1 (0.3)         | 0              | 0              | 0                | 0              | 0              | 0              |
| Pulmonary embolism                                      | 4 (1.0)           | 1 (0.3)         | 1 (0.3)        | 1 (0.3)        | 5 (1.3)          | 0              | 2 (0.5)        | 2 (0.5)        |
| Epistaxis                                               | 4 (1.0)           | 0               | 0              | 0              | 2 (0.5)          | 1 (0.3)        | 0              | 0              |
| Bronchospasm                                            | 3 (0.8)           | 1 (0.3)         | 0              | 0              | 1 (0.3)          | 1 (0.3)        | 0              | 0              |
| Hypoxia                                                 | 3 (0.8)           | 2 (0.5)         | 0              | 0              | 2 (0.5)          | 2 (0.5)        | 0              | 0              |
| Pneumonia aspiration                                    | 3 (0.8)           | 0               | 0              | 2 (0.5)        | 1 (0.3)          | 0              | 1 (0.3)        | 0              |
| Acute pulmonary edema                                   | 2 (0.5)           | 1 (0.3)         | 0              | 1 (0.3)        | 1 (0.3)          | 0              | 1 (0.3)        | 0              |
| Apnea                                                   | 1 (0.3)           | 1 (0.3)         | 0              | 0              | 0                | 0              | 0              | 0              |
| Aspiration                                              | 1 (0.3)           | 1 (0.3)         | 0              | 0              | 0                | 0              | 0              | 0              |

|                                             |            |          |         |         |            |          |          |         |
|---------------------------------------------|------------|----------|---------|---------|------------|----------|----------|---------|
| Pulmonary edema                             | 1 (0.3)    | 0        | 0       | 1 (0.3) | 0          | 0        | 0        | 0       |
| Acute respiratory failure                   | 0          | 0        | 0       | 0       | 1 (0.3)    | 0        | 0        | 1 (0.3) |
| Respiratory failure                         | 0          | 0        | 0       | 0       | 1 (0.3)    | 0        | 0        | 1 (0.3) |
| Hiccups                                     | 0          | 0        | 0       | 0       | 2 (0.5)    | 1 (0.3)  | 0        | 0       |
| Lung disorder                               | 0          | 0        | 0       | 0       | 1 (0.3)    | 1 (0.3)  | 0        | 0       |
| Pulmonary hypertension                      | 0          | 0        | 0       | 0       | 1 (0.3)    | 1 (0.3)  | 0        | 0       |
| <b>Blood and lymphatic system disorders</b> | 102 (26.0) | 39 (9.9) | 5 (1.3) | 0       | 103 (26.0) | 38 (9.6) | 14 (3.5) | 0       |
| Anemia                                      | 90 (22.9)  | 37 (9.4) | 3 (0.8) | 0       | 88 (22.2)  | 35 (8.8) | 8 (2.0)  | 0       |
| Thrombocytopenia                            | 9 (2.3)    | 2 (0.5)  | 1 (0.3) | 0       | 18 (4.5)   | 3 (0.8)  | 5 (1.3)  | 0       |
| Neutropenia                                 | 7 (1.8)    | 0        | 0       | 0       | 8 (2.0)    | 3 (0.8)  | 0        | 0       |
| Febrile neutropenia                         | 2 (0.5)    | 1 (0.3)  | 1 (0.3) | 0       | 1 (0.3)    | 0        | 1 (0.3)  | 0       |
| Lymphadenopathy                             | 2 (0.5)    | 1 (0.3)  | 0       | 0       | 0          | 0        | 0        | 0       |
| Coagulopathy                                | 1 (0.3)    | 1 (0.3)  | 0       | 0       | 0          | 0        | 0        | 0       |
| Hemolysis                                   | 1 (0.3)    | 1 (0.3)  | 0       | 0       | 0          | 0        | 0        | 0       |
| Leukopenia                                  | 1 (0.3)    | 1 (0.3)  | 0       | 0       | 7 (1.8)    | 2 (0.5)  | 1 (0.3)  | 0       |
| Lymphopenia                                 | 1 (0.3)    | 0        | 0       | 0       | 4 (1.0)    | 1 (0.3)  | 1 (0.3)  | 0       |
| <b>Renal and urinary disorders</b>          | 74 (18.8)  | 21 (5.3) | 2 (0.5) | 2 (0.5) | 60 (15.2)  | 20 (5.1) | 1 (0.3)  | 0       |
| Hematuria                                   | 15 (3.8)   | 2 (0.5)  | 0       | 0       | 15 (3.8)   | 4 (1.0)  | 0        | 0       |
| Urinary retention                           | 12 (3.1)   | 2 (0.5)  | 0       | 0       | 10 (2.5)   | 2 (0.5)  | 0        | 0       |
| Urinary incontinence                        | 10 (2.5)   | 2 (0.5)  | 0       | 0       | 4 (1.0)    | 2 (0.5)  | 0        | 0       |
| Acute renal failure                         | 9 (2.3)    | 6 (1.5)  | 1 (0.3) | 1 (0.3) | 2 (0.5)    | 2 (0.5)  | 0        | 0       |
| Dysuria                                     | 8 (2.0)    | 0        | 0       | 0       | 6 (1.5)    | 1 (0.3)  | 0        | 0       |
| Proteinuria                                 | 6 (1.5)    | 0        | 0       | 0       | 6 (1.5)    | 1 (0.3)  | 0        | 0       |
| Renal failure                               | 6 (1.5)    | 3 (0.8)  | 1 (0.3) | 1 (0.3) | 4 (1.0)    | 3 (0.8)  | 0        | 0       |
| Nocturia                                    | 3 (0.8)    | 1 (0.3)  | 0       | 0       | 3 (0.8)    | 0        | 0        | 0       |
| Ureteric obstruction                        | 3 (0.8)    | 3 (0.8)  | 0       | 0       | 0          | 0        | 0        | 0       |
| Urethral obstruction                        | 0          | 0        | 0       | 0       | 1 (0.3)    | 0        | 0        | 0       |
| Bladder obstruction                         | 2 (0.5)    | 1 (0.3)  | 0       | 0       | 0          | 0        | 0        | 0       |
| Hydronephrosis                              | 2 (0.5)    | 1 (0.3)  | 0       | 0       | 5 (1.3)    | 2 (0.5)  | 1 (0.3)  | 0       |
| Micturition urgency                         | 2 (0.5)    | 1 (0.3)  | 0       | 0       | 2 (0.5)    | 1 (0.3)  | 0        | 0       |
| Renal impairment                            | 2 (0.5)    | 0        | 0       | 0       | 2 (0.5)    | 1 (0.3)  | 0        | 0       |
| Bladder dilatation                          | 1 (0.3)    | 1 (0.3)  | 0       | 0       | 0          | 0        | 0        | 0       |
| Pyelocaliectasis                            | 1 (0.3)    | 1 (0.3)  | 0       | 0       | 0          | 0        | 0        | 0       |

|                                                       |                  |                 |                |                 |                  |                 |                |                 |
|-------------------------------------------------------|------------------|-----------------|----------------|-----------------|------------------|-----------------|----------------|-----------------|
| Renal injury                                          | 1 (0.3)          | 1 (0.3)         | 0              | 0               | 0                | 0               | 0              | 0               |
| Anuria                                                | 1 (0.3)          | 0               | 0              | 0               | 1 (0.3)          | 1 (0.3)         | 0              | 0               |
| <b>Psychiatric disorders</b>                          | <b>73 (18.6)</b> | <b>10 (2.5)</b> | <b>3 (0.8)</b> | <b>1 (0.3)</b>  | <b>74 (18.7)</b> | <b>11 (2.8)</b> | <b>1 (0.3)</b> | <b>0</b>        |
| Insomnia                                              | 31 (7.9)         | 0               | 0              | 0               | 34 (8.6)         | 3 (0.8)         | 0              | 0               |
| Confusional state                                     | 14 (3.6)         | 3 (0.8)         | 1 (0.3)        | 0               | 12 (3.0)         | 4 (1.0)         | 0              | 0               |
| Depression                                            | 11 (2.8)         | 3 (0.8)         | 1 (0.3)        | 0               | 20 (5.1)         | 1 (0.3)         | 0              | 0               |
| Hallucination                                         | 4 (1.0)          | 2 (0.5)         | 0              | 0               | 1 (0.3)          | 1 (0.3)         | 0              | 0               |
| Agitation                                             | 2 (0.5)          | 1 (0.3)         | 0              | 0               | 0                | 0               | 0              | 0               |
| Delirium                                              | 2 (0.5)          | 1 (0.3)         | 0              | 0               | 1 (0.3)          | 1 (0.3)         | 0              | 0               |
| Restlessness                                          | 2 (0.5)          | 1 (0.3)         | 0              | 0               | 0                | 0               | 0              | 0               |
| Self injurious behavior                               | 1 (0.3)          | 0               | 0              | 1 (0.3)         | 0                | 0               | 0              | 0               |
| Suicidal ideation                                     | 1 (0.3)          | 0               | 1 (0.3)        | 0               | 0                | 0               | 0              | 0               |
| Major depression                                      | 0                | 0               | 0              | 0               | 1 (0.3)          | 0               | 1 (0.3)        | 0               |
| Hallucination, visual                                 | 0                | 0               | 0              | 0               | 1 (0.3)          | 1 (0.3)         | 0              | 0               |
| <b>Vascular disorders</b>                             | <b>64 (16.3)</b> | <b>10 (2.5)</b> | <b>0</b>       | <b>0</b>        | <b>50 (12.6)</b> | <b>7 (1.8)</b>  | <b>0</b>       | <b>1 (0.3)</b>  |
| Hypertension                                          | 20 (5.1)         | 1 (0.3)         | 0              | 0               | 13 (3.3)         | 1 (0.3)         | 0              | 0               |
| Hypotension                                           | 19 (4.8)         | 4 (1.0)         | 0              | 0               | 14 (3.5)         | 1 (0.3)         | 0              | 0               |
| Hot flush                                             | 7 (1.8)          | 1 (0.3)         | 0              | 0               | 3 (0.8)          | 0               | 0              | 0               |
| Deep vein thrombosis                                  | 5 (1.3)          | 2 (0.5)         | 0              | 0               | 3 (0.8)          | 3 (0.8)         | 0              | 0               |
| Thrombosis                                            | 2 (0.5)          | 1 (0.3)         | 0              | 0               | 0                | 0               | 0              | 0               |
| Hypovolemic shock                                     | 1 (0.3)          | 1 (0.3)         | 0              | 0               | 1 (0.3)          | 0               | 0              | 1 (0.3)         |
| Venous thrombosis                                     | 1 (0.3)          | 1 (0.3)         | 0              | 0               | 0                | 0               | 0              | 0               |
| Orthostatic hypotension                               | 0                | 0               | 0              | 0               | 2 (0.5)          | 1 (0.3)         | 0              | 0               |
| Peripheral ischemia                                   | 0                | 0               | 0              | 0               | 1 (0.3)          | 1 (0.3)         | 0              | 0               |
| <b>Neoplasms (benign, malignant, and unspecified)</b> | <b>46 (11.7)</b> | <b>6 (1.5)</b>  | <b>5 (1.3)</b> | <b>32 (8.1)</b> | <b>46 (11.6)</b> | <b>6 (1.5)</b>  | <b>5 (1.3)</b> | <b>24 (6.1)</b> |
| Malignant neoplasm progression                        | 36 (9.2)         | 3 (0.8)         | 2 (0.5)        | 30 (7.6)        | 31 (7.8)         | 2 (0.5)         | 3 (0.8)        | 24 (6.1)        |
| Tumor pain                                            | 3 (0.8)          | 1 (0.3)         | 1 (0.3)        | 0               | 5 (1.3)          | 1 (0.3)         | 0              | 0               |
| Metastases to bone                                    | 2 (0.5)          | 0               | 1 (0.3)        | 0               | 1 (0.3)          | 1 (0.3)         | 0              | 0               |
| Cerebellopontine angle tumor                          | 1 (0.3)          | 1 (0.3)         | 0              | 0               | 0                | 0               | 0              | 0               |
| Lymphangiosis carcinomatosa                           | 1 (0.3)          | 0               | 0              | 1 (0.3)         | 0                | 0               | 0              | 0               |
| Malignant neoplasm of spinal cord                     | 1 (0.3)          | 1 (0.3)         | 0              | 0               | 0                | 0               | 0              | 0               |
| Prostate cancer                                       | 1 (0.3)          | 0               | 0              | 1 (0.3)         | 0                | 0               | 0              | 0               |

|                                                        |          |          |         |         |          |         |         |         |
|--------------------------------------------------------|----------|----------|---------|---------|----------|---------|---------|---------|
| Metastatic prostate cancer                             | 1 (0.3)  | 0        | 1 (0.3) | 0       | 0        | 0       | 0       | 0       |
| Tumor associated fever                                 | 1 (0.3)  | 1 (0.3)  | 0       | 0       | 0        | 0       | 0       | 0       |
| Metastases to central nervous system                   | 0        | 0        | 0       | 0       | 2 (0.5)  | 0       | 1 (0.3) | 0       |
| Metastatic neoplasm                                    | 0        | 0        | 0       | 0       | 1 (0.3)  | 0       | 1 (0.3) | 0       |
| Cancer pain                                            | 0        | 0        | 0       | 0       | 2 (0.5)  | 2 (0.5) | 0       | 0       |
| <b>Eye disorders</b>                                   | 37 (9.4) | 2 (0.5)  | 1 (0.3) | 0       | 28 (7.1) | 4 (1.0) | 1 (0.3) | 0       |
| Blindness                                              | 1 (0.3)  | 0        | 1 (0.3) | 0       | 0        | 0       | 0       | 0       |
| Cataract                                               | 1 (0.3)  | 1 (0.3)  | 0       | 0       | 1 (0.3)  | 1 (0.3) | 0       | 0       |
| Uveitis                                                | 1 (0.3)  | 1 (0.3)  | 0       | 0       | 1 (0.3)  | 0       | 0       | 0       |
| Visual impairment                                      | 1 (0.3)  | 0        | 0       | 0       | 4 (1.0)  | 1 (0.3) | 0       | 0       |
| Papilloedema                                           | 0        | 0        | 0       | 0       | 1 (0.3)  | 0       | 1 (0.3) | 0       |
| Retinal vein thrombosis                                | 0        | 0        | 0       | 0       | 1 (0.3)  | 1 (0.3) | 0       | 0       |
| Visual acuity reduced                                  | 0        | 0        | 0       | 0       | 1 (0.3)  | 1 (0.3) | 0       | 0       |
| <b>Cardiac disorders</b>                               | 35 (8.9) | 9 (2.3)  | 3 (0.8) | 9 (2.3) | 27 (6.8) | 2 (0.5) | 1 (0.3) | 5 (1.3) |
| Atrial fibrillation                                    | 5 (1.3)  | 4 (1.0)  | 0       | 1 (0.3) | 4 (1.0)  | 0       | 0       | 0       |
| Arrhythmia                                             | 3 (0.8)  | 0        | 1 (0.3) | 0       | 0        | 0       | 0       | 0       |
| Cardiac failure                                        | 3 (0.8)  | 2 (0.5)  | 0       | 1 (0.3) | 2 (0.5)  | 0       | 0       | 1 (0.3) |
| Pericardial effusion                                   | 3 (0.8)  | 1 (0.3)  | 0       | 0       | 0        | 0       | 0       | 0       |
| Acute myocardial infarction                            | 2 (0.5)  | 0        | 1 (0.3) | 1 (0.3) | 1 (0.3)  | 0       | 0       | 0       |
| Cardiac arrest                                         | 2 (0.5)  | 0        | 0       | 2 (0.5) | 0        | 0       | 0       | 0       |
| Cardio-respiratory arrest                              | 2 (0.5)  | 0        | 0       | 2 (0.5) | 2 (0.5)  | 0       | 0       | 2 (0.5) |
| Myocardial infarction                                  | 2 (0.5)  | 0        | 1 (0.3) | 1 (0.3) | 1 (0.3)  | 0       | 0       | 1 (0.3) |
| Unstable angina                                        | 1 (0.3)  | 1 (0.3)  | 0       | 0       | 0        | 0       | 0       | 0       |
| Bradycardia                                            | 1 (0.3)  | 1 (0.3)  | 0       | 0       | 1 (0.3)  | 0       | 0       | 0       |
| Acute cardiac failure                                  | 1 (0.3)  | 0        | 1 (0.3) | 0       | 0        | 0       | 0       | 0       |
| Cardiopulmonary failure                                | 1 (0.3)  | 0        | 0       | 1 (0.3) | 1 (0.3)  | 0       | 0       | 1 (0.3) |
| Cardiac failure congestive                             | 0        | 0        | 0       | 0       | 1 (0.3)  | 0       | 1 (0.3) | 0       |
| Cardiac valve disease                                  | 0        | 0        | 0       | 0       | 1 (0.3)  | 1 (0.3) | 0       | 0       |
| Tachyarrhythmia                                        | 0        | 0        | 0       | 0       | 1 (0.3)  | 1 (0.3) | 0       | 0       |
| <b>Injury, poisoning, and procedural complications</b> | 31 (7.9) | 10 (2.5) | 0       | 0       | 21 (5.3) | 3 (0.8) | 1 (0.3) | 0       |
| Fall                                                   | 7 (1.8)  | 1 (0.3)  | 0       | 0       | 3 (0.8)  | 0       | 0       | 0       |
| Fracture                                               | 3 (0.8)  | 1 (0.3)  | 0       | 0       | 0        | 0       | 0       | 0       |

|                                                 |            |            |          |          |            |          |         |          |
|-------------------------------------------------|------------|------------|----------|----------|------------|----------|---------|----------|
| Subdural hematoma                               | 2 (0.5)    | 2 (0.5)    | 0        | 0        | 2 (0.5)    | 1 (0.3)  | 1 (0.3) | 0        |
| Ankle fracture                                  | 1 (0.3)    | 1 (0.3)    | 0        | 0        | 0          | 0        | 0       | 0        |
| Bone fissure                                    | 1 (0.3)    | 1 (0.3)    | 0        | 0        | 0          | 0        | 0       | 0        |
| Femur fracture                                  | 1 (0.3)    | 1 (0.3)    | 0        | 0        | 0          | 0        | 0       | 0        |
| Hip fracture                                    | 1 (0.3)    | 1 (0.3)    | 0        | 0        | 0          | 0        | 0       | 0        |
| Humerus fracture                                | 1 (0.3)    | 1 (0.3)    | 0        | 0        | 0          | 0        | 0       | 0        |
| Toxicity to various agents                      | 1 (0.3)    | 1 (0.3)    | 0        | 0        | 0          | 0        | 0       | 0        |
| Eschar                                          | 1 (0.3)    | 0          | 0        | 0        | 1 (0.3)    | 1 (0.3)  | 0       | 0        |
| Femoral neck fracture                           | 0          | 0          | 0        | 0        | 1 (0.3)    | 1 (0.3)  | 0       | 0        |
| <b>Endocrine disorders</b>                      | 21 (5.3)   | 6 (1.5)    | 0        | 0        | 8 (2.0)    | 2 (0.5)  | 0       | 0        |
| Hypothyroidism                                  | 9 (2.3)    | 2 (0.5)    | 0        | 0        | 1 (0.3)    | 0        | 0       | 0        |
| Adrenal insufficiency                           | 6 (1.5)    | 2 (0.5)    | 0        | 0        | 3 (0.8)    | 1 (0.8)  | 0       | 0        |
| Hyperthyroidism                                 | 6 (1.5)    | 1 (0.3)    | 0        | 0        | 0          | 0        | 0       | 0        |
| Hypophysitis                                    | 4 (1.0)    | 1 (0.3)    | 0        | 0        | 2 (0.5)    | 1 (0.3)  | 0       | 0        |
| Hypopituitarism                                 | 3 (0.8)    | 3 (0.8)    | 0        | 0        | 0          | 0        | 0       | 0        |
| <b>Hepatobiliary disorders</b>                  | 20 (5.1)   | 6 (1.5)    | 1 (0.3)  | 3 (0.8)  | 6 (1.5)    | 1 (0.3)  | 0       | 1 (0.3)  |
| Hepatitis                                       | 5 (1.3)    | 1 (0.3)    | 0        | 1 (0.3)  | 0          | 0        | 0       | 0        |
| Jaundice                                        | 5 (1.3)    | 1 (0.3)    | 0        | 0        | 0          | 0        | 0       | 0        |
| Autoimmune hepatitis                            | 3 (0.8)    | 2 (0.5)    | 0        | 0        | 0          | 0        | 0       | 0        |
| Hepatotoxicity                                  | 2 (0.5)    | 2 (0.5)    | 0        | 0        | 0          | 0        | 0       | 0        |
| Cholangitis                                     | 1 (0.3)    | 0          | 0        | 1 (0.3)  | 0          | 0        | 0       | 0        |
| Acute cholecystitis                             | 1 (0.3)    | 0          | 1 (0.3)  | 0        | 0          | 0        | 0       | 0        |
| Chronic cholecystitis                           | 1 (0.3)    | 1 (0.3)    | 0        | 0        | 0          | 0        | 0       | 0        |
| Hepatic failure                                 | 1 (0.3)    | 0          | 0        | 1 (0.3)  | 0          | 0        | 0       | 0        |
| Jaundice cholestatic                            | 0          | 0          | 0        | 0        | 1 (0.3)    | 0        | 0       | 1 (0.3)  |
| Hepatic function abnormal                       | 0          | 0          | 0        | 0        | 1 (0.3)    | 1 (0.3)  | 0       | 0        |
| <b>Reproductive system and breast disorders</b> | 11 (2.8)   | 0          | 0        | 0        | 16 (4.0)   | 1 (0.3)  | 0       | 0        |
| Pelvic pain                                     | 5 (1.3)    | 0          | 0        | 0        | 9 (2.3)    | 1 (0.3)  | 0       | 0        |
| <b>Drug-related event</b>                       | 295 (75.1) | 123 (31.3) | 19 (4.8) | 3 (0.8)  | 180 (45.5) | 33 (8.3) | 7 (1.8) | 1 (0.3)  |
| <b>Events leading to discontinuation</b>        | 137 (34.9) | 80 (20.4)  | 19 (4.8) | 22 (5.6) | 62 (15.7)  | 25 (6.3) | 8 (2.0) | 15 (3.8) |
| <b>Immune-related events</b>                    | 249 (63.4) | 93 (23.7)  | 8 (2.0)  | 1 (0.3)  | 86 (21.7)  | 11 (2.8) | 0       | 1 (0.3)  |
| Gastrointestinal**                              | 160 (40.7) | 65 (16.5)  | 6 (1.5)  | 1 (0.3)  | 56 (14.1)  | 3 (0.8)  | 0       | 0        |
| Diarrhea                                        | 155 (39.4) | 58 (14.8)  | 1 (0.3)  | 0        | 55 (13.9)  | 3 (0.8)  | 0       | 0        |

|                                      |            |          |         |   |          |         |         |   |
|--------------------------------------|------------|----------|---------|---|----------|---------|---------|---|
| Colitis                              | 27 (6.9)   | 15 (3.8) | 3 (0.8) | 0 | 3 (0.8)  | 0       | 0       | 0 |
| Skin                                 | 137 (34.9) | 4 (1.0)  | 0       | 0 | 29 (7.3) | 0       | 0       | 0 |
| Pruritus                             | 80 (20.4)  | 1 (0.3)  | 0       | 0 | 15 (3.8) | 0       | 0       | 0 |
| Rash                                 | 68 (17.3)  | 2 (0.5)  | 0       | 0 | 16 (4.0) | 0       | 0       | 0 |
| Investigations                       | 35 (8.9)   | 15 (3.8) | 2 (0.5) | 0 | 20 (5.1) | 6 (1.5) | 1 (0.3) | 0 |
| Aspartate aminotransferase increased | 22 (5.6)   | 8 (2.0)  | 1 (0.3) | 0 | 13 (3.3) | 3 (0.8) | 1 (1.0) | 0 |
| Alanine aminotransferase increased   | 20 (5.1)   | 6 (1.5)  | 0       | 0 | 8 (2.0)  | 3 (0.8) | 0       | 0 |
| Lipase increased                     | 2 (0.5)    | 0        | 1 (0.3) | 0 | 2 (0.5)  | 2 (0.5) | 0       | 0 |
| Endocrine                            | 18 (4.6)   | 6 (1.5)  | 0       | 0 | 4 (1.0)  | 2 (0.5) | 0       | 0 |
| Hypothyroidism                       | 9 (2.3)    | 2 (0.5)  | 0       | 0 | 1 (0.3)  | 0       | 0       | 0 |
| Adrenal insufficiency                | 6 (1.5)    | 2 (0.5)  | 0       | 0 | 2 (0.5)  | 1 (0.3) | 0       | 0 |
| Hepatobiliary disorders              | 11 (2.8)   | 5 (1.3)  | 0       | 0 | 0        | 0       | 0       | 0 |
| Hepatitis                            | 3 (0.8)    | 1 (0.3)  | 0       | 0 | 0        | 0       | 0       | 0 |
| Hepatotoxicity                       | 2 (0.5)    | 2 (0.5)  | 0       | 0 | 0        | 0       | 0       | 0 |
| Neurologic                           | 8 (2.0)    | 1 (0.3)  | 0       | 0 | 1 (0.3)  | 0       | 0       | 0 |
| Motor dysfunction                    | 1 (0.3)    | 1 (0.3)  | 0       | 0 | 0        | 0       | 0       | 0 |

Data are n (%). Patients may have had more than one event.

\*Events of any grade that occurred in  $\geq 10\%$  of patients in one or both treatment arms or any event of grade 3, 4, or 5 severity.

\*\*Incidence of GI perforation was 0.5%.

**Supplementary Table 5: On-study AEs by pretreatment RT to pelvis vs non-pelvis**

|                     | Pelvis RT               |                      | Non-pelvis RT           |                      |
|---------------------|-------------------------|----------------------|-------------------------|----------------------|
|                     | Ipilimumab + RT (n=141) | Placebo + RT (n=122) | Ipilimumab + RT (n=252) | Placebo + RT (n=274) |
| Any AE              | 139 (98.6)              | 112 (91.8)           | 246 (97.6)              | 252 (92.0)           |
| Grade 3 or 4        | 78 (55.3)               | 57 (46.7)            | 154 (61.1)              | 105 (38.3)           |
| Fatal AE            | 28 (19.9)               | 10 (8.2)             | 38 (15.1)               | 6 (2.2)              |
| GI AEs, any grade   | 109 (77.3)              | 76 (62.3)            | 176 (69.8)              | 148 (54.0)           |
| Grade 3 or 4        | 36 (25.5)               | 13 (10.7)            | 55 (21.8)               | 20 (7.3)             |
| Diarrhea, any grade | 79 (56.0)               | 32 (26.2)            | 120 (47.6)              | 65 (23.7)            |
| Grade 3 or 4        | 28 (19.9)               | 3 (2.5)              | 36 (14.3)               | 4 (1.5)              |



**Supplementary Table 6: Time to onset and resolution of grade 3 or 4 immune-related adverse events for ipilimumab-treated patients**

| Organ system            | Time to onset       |                        | Time to resolution        |                        |
|-------------------------|---------------------|------------------------|---------------------------|------------------------|
|                         | No. events treated* | Median (weeks, 95% CI) | No. events resolved (%)** | Median (weeks, 95% CI) |
| <b>Gastrointestinal</b> | 71                  | 5.7 (4.9–7.0)          | 63 (89)                   | 2.9 (1.6–4.7)          |
| <b>Hepatic</b>          | 18                  | 9.1 (8.3–10.4)         | 18 (100)                  | 4.1 (3.6–8.1)          |
| <b>Endocrine</b>        | 8                   | 7.9 (4.1–11.1)         | 6 (75)                    | 11.1 (2.4–NE)          |
| <b>Skin</b>             | 4                   | 3.7 (2.6–6.4)          | 4 (100)                   | 3.6 (2.6–5.9)          |
| <b>Neurological</b>     | 1                   | 11.1 (NE)              | 0 (0)                     | ---                    |

\*No. of events equal to number of patients; one event occurred per patient.

\*\*Resolution of a grade 3 or 4 immune-related adverse event was defined as improvement to grade 1 or less or to the worst grade at baseline.

NE=not estimable due to censored observations or median not having been observed.

**Supplementary Table 7: Deaths among treated patients**

|                          | <b>Ipilimumab (n=393)</b> | <b>Placebo (n=396)</b> |
|--------------------------|---------------------------|------------------------|
| <b>Total deaths</b>      | 266 (68%)                 | 304 (77%)              |
| Disease progression      | 204 (52%)                 | 243 (61%)              |
| Study drug toxic effects | 4 (1%)                    | 0                      |
| Other*                   | 47 (12%)                  | 38 (10%)               |
| Unknown                  | 11 (3%)                   | 23 (6%)                |

Data are n (%). \*Two additional patients in the ipilimumab group and one in the placebo group died of drug-related serious adverse events.

**Supplementary Table 8: Baseline prognostic factors for patients who lived ≤5 months and for those who lived >5 months**

|                                           | OS ≤5 months |         | OS >5 months |         |
|-------------------------------------------|--------------|---------|--------------|---------|
|                                           | Ipilimumab   | Placebo | Ipilimumab   | Placebo |
| Number of patients                        | 117          | 90      | 282          | 310     |
| Hemoglobin <11 g/dL (per IVRS and CRF), % | 38.5         | 32.2    | 18.4         | 20      |
| Hemoglobin <11 g/dL (CRF), %              | 44.4         | 38.9    | 22.7         | 24.5    |
| ECOG 0 (per IVRS and CRF), %              | 30.8         | 25.6    | 41.5         | 39.7    |
| ECOG 1 (per IVRS and CRF), %              | 65           | 58.9    | 45.4         | 48      |
| ECOG 0 (CRF), %                           | 31.6         | 34.4    | 46.5         | 44.8    |
| ECOG 1 (CRF), %                           | 65           | 58.9    | 49.6         | 53.9    |
| ALP ≥1.5 x ULN (IVRS and CRF), %          | 54.7         | 51.1    | 27           | 27.7    |
| ALP ≥1.5 x ULN (CRF), %                   | 63.2         | 58.9    | 31.6         | 31.6    |
| Age ≥70                                   | 53.8         | 45.6    | 42.9         | 40.3    |
| Liver metastases, %                       | 23.1         | 22.2    | 7.8          | 8.7     |
| Visceral metastases, %                    | 43.6         | 44.4    | 22           | 23.9    |
| PSA, median                               | 270          | 292.5   | 110          | 118     |
| Elevated baseline LDH, %                  | 29.9         | 34.4    | 8.2          | 7.1     |
| Average daily worst pain intensity ≥4, %  | 60.7         | 53.3    | 44.7         | 44.5    |

CRF=case report form. IVRS=Interactive Voice Response System.

**Supplementary Figure 1: Multivariate analyses of baseline prognostic features**

Subgroup analysis of OS in patients with alkaline phosphatase  $\geq 1.5 \times$  ULN, hemoglobin  $< 11$  g/dL, and presence of visceral metastases (ipilimumab, n=24; placebo, n=15).

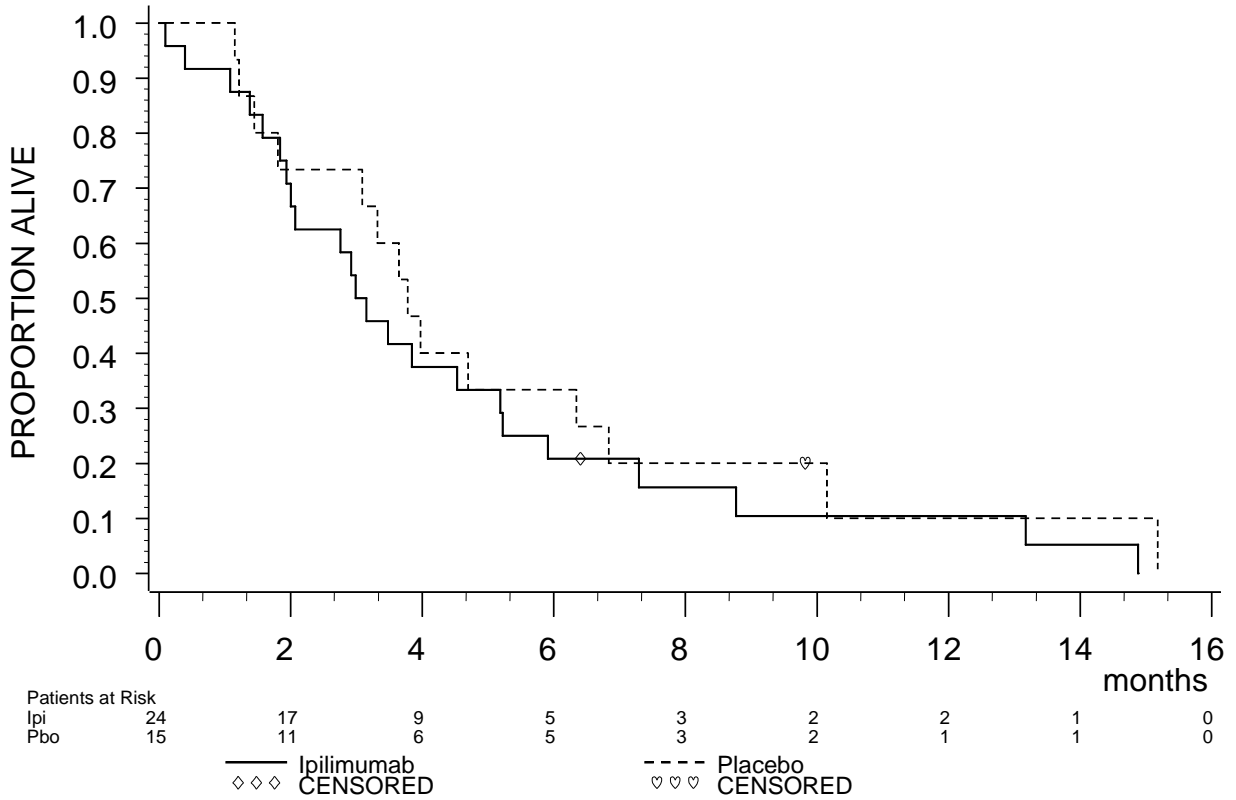

| GROUP                   | # DEAD / # RANDOMIZED | MEDIAN (95% CI) | HAZARD RATIO (95% CI) |
|-------------------------|-----------------------|-----------------|-----------------------|
| Ipilimumab              | 23/24                 | 3.1 (2.0 - 5.2) |                       |
| Placebo                 | 14/15                 | 3.8 (3.1 - 6.3) |                       |
| Ipilimumab over Placebo |                       |                 | 1.32 ( 0.67 - 2.62)   |

Subgroup analysis of OS in patients with alkaline phosphatase  $\geq 1.5 \times$  ULN, hemoglobin  $< 11$  g/dL, and an ECOG performance status of 1 (ipilimumab, n=45; placebo, n=46).

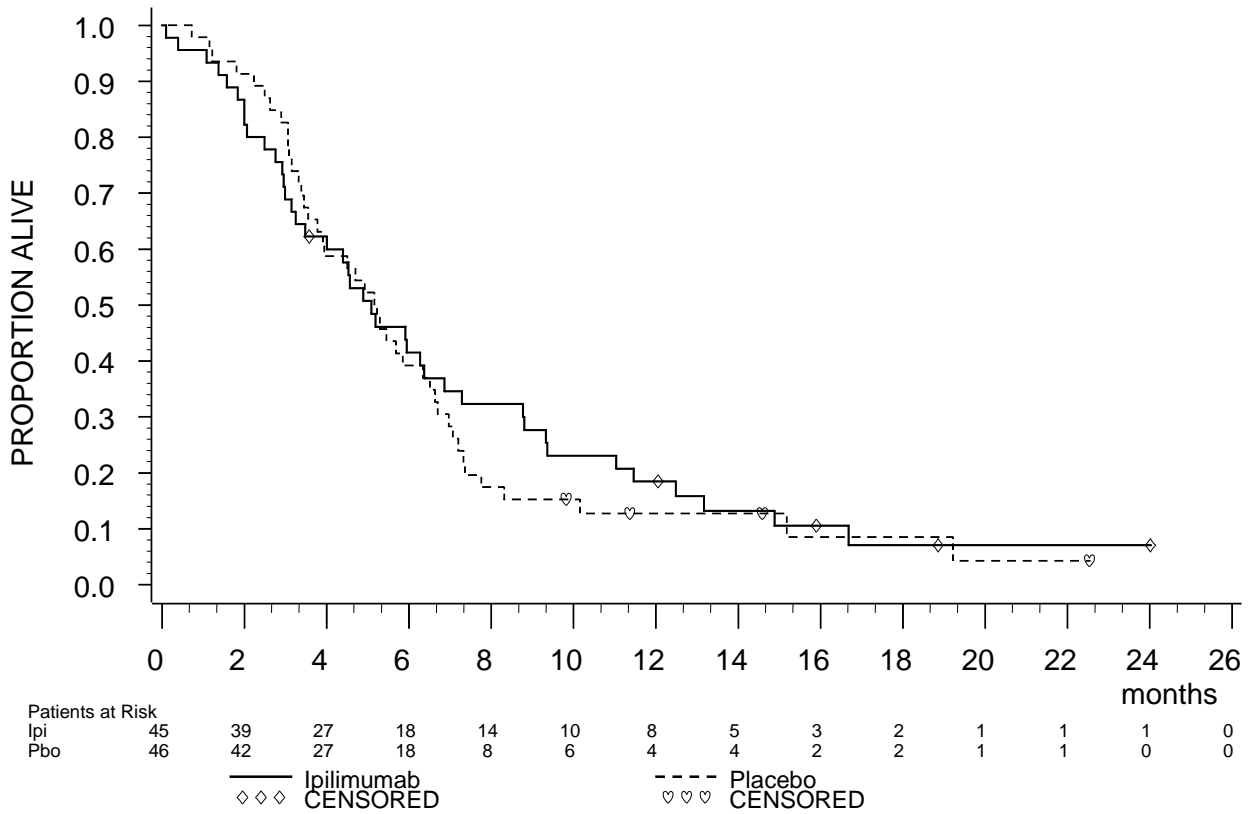

| GROUP                   | # DEAD / # RANDOMIZED | MEDIAN (95% CI) | HAZARD RATIO (95% CI) |
|-------------------------|-----------------------|-----------------|-----------------------|
| Ipilimumab              | 40/45                 | 5.1 (3.5 - 6.9) |                       |
| Placebo                 | 42/46                 | 5.2 (3.8 - 6.5) |                       |
| Ipilimumab over Placebo |                       |                 | 0.91 ( 0.59 - 1.41)   |

Subgroup analysis of OS in patients with alkaline phosphatase <1.5 x ULN, hemoglobin  $\geq$ 11 g/dL, and an ECOG performance status of 0 (ipilimumab, n=101; placebo, n=95).

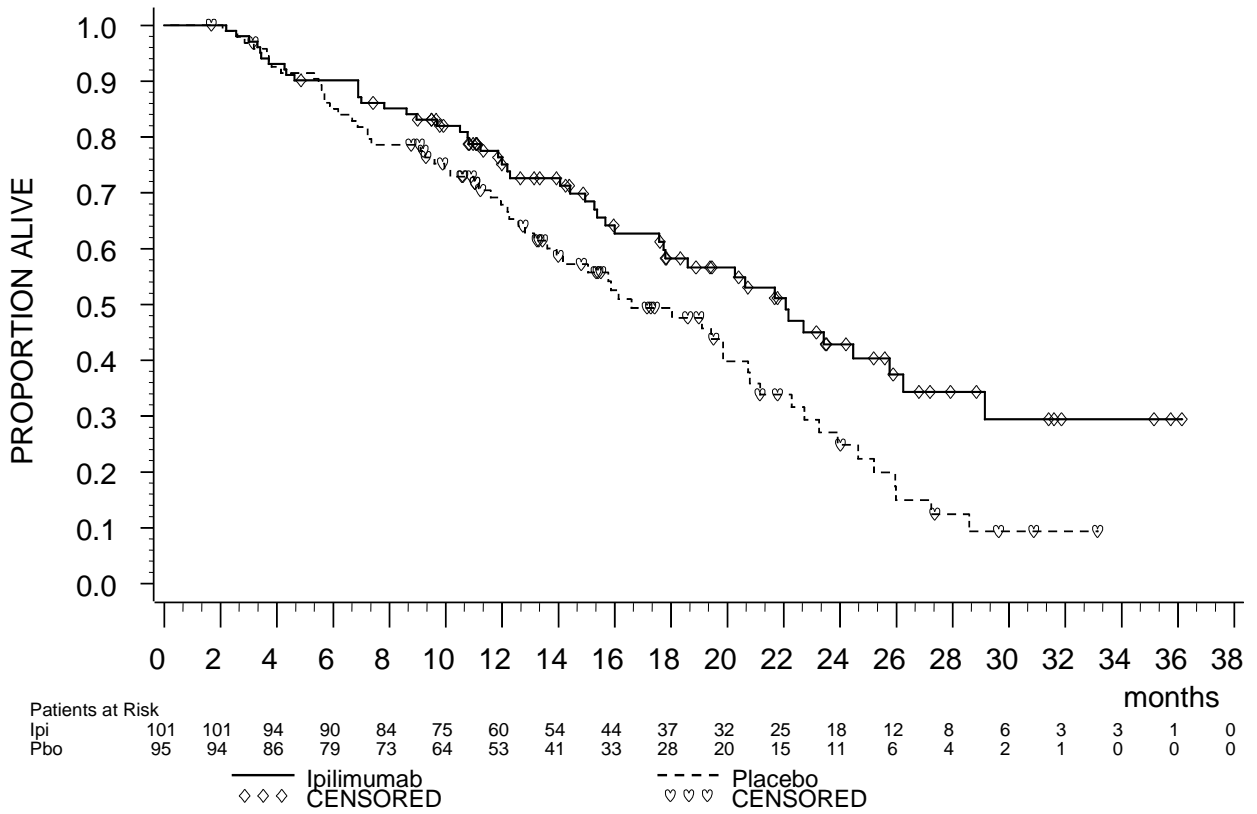

| GROUP                   | # DEAD / # RANDOMIZED | MEDIAN (95% CI)    | HAZARD RATIO (95% CI) |
|-------------------------|-----------------------|--------------------|-----------------------|
| Ipilimumab              | 48/101                | 22.1 (17.7 - 26.3) |                       |
| Placebo                 | 60/95                 | 16.6 (13.6 - 20.7) |                       |
| Ipilimumab over Placebo |                       |                    | 0.63 (0.43 - 0.92)    |

Subgroup analysis of OS in patients with alkaline phosphatase <1.5 x ULN and hemoglobin ≥11 g/dL (ipilimumab, n=190; placebo, n=194).

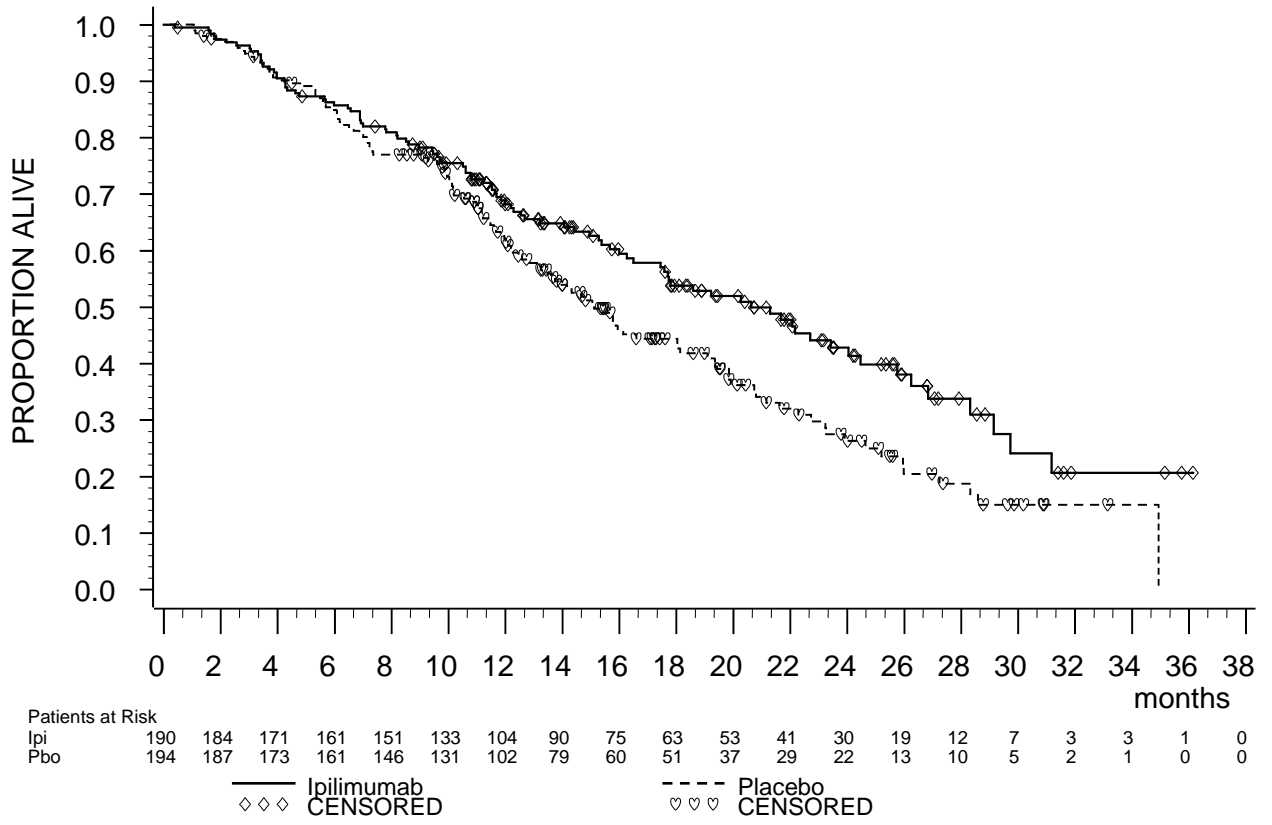

| GROUP                   | # DEAD / # RANDOMIZED | MEDIAN (95% CI)    | HAZARD RATIO (95% CI) |
|-------------------------|-----------------------|--------------------|-----------------------|
| Ipilimumab              | 96/190                | 20.6 (17.4 - 24.5) |                       |
| Placebo                 | 122/194               | 15.1 (13.1 - 18.1) |                       |
| Ipilimumab over Placebo |                       |                    | 0.71 (0.54 - 0.93)    |

### Supplementary Figure 2: Waterfall plots of PSA levels

Maximum percent change in PSA levels from baseline in the ipilimumab arm (n=297; top panel) and in the placebo arm (n=305; bottom panel).

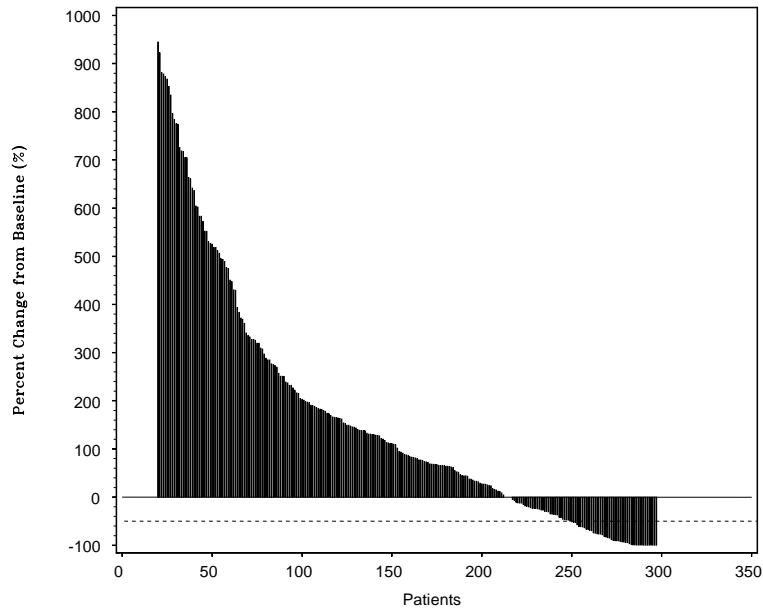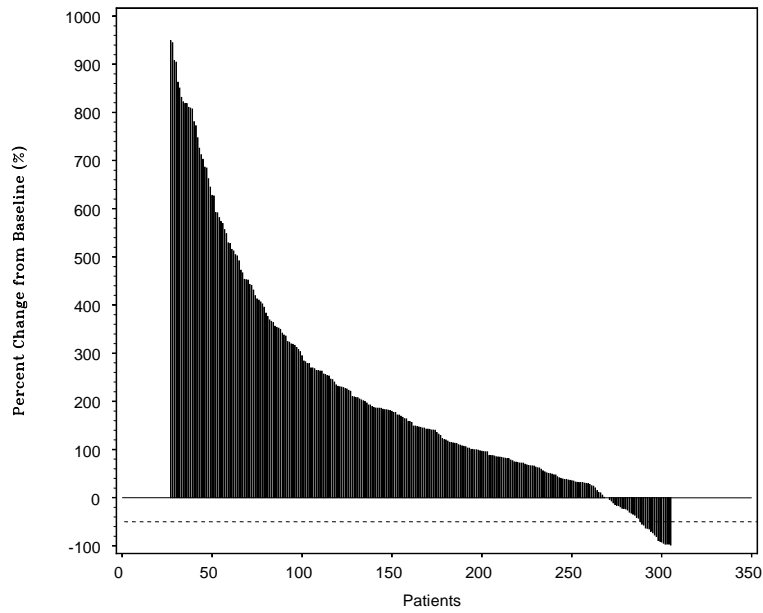



## Investigator list

| Country            | Investigator            | Site # | Subjects Enrolled | Subjects Treated |
|--------------------|-------------------------|--------|-------------------|------------------|
| USA                | Eugene D. Kwon          | 00025  | 41                | 37               |
| France             | Alberto Bossi           | 00116  | 30                | 29               |
| Netherlands        | Alfons Van Den Eertwegh | 00006  | 29                | 26               |
| France             | Guilhem Roubaud         | 00115  | 18                | 15               |
| Austria            | Michael Krainer         | 00004  | 17                | 17               |
| Australia          | Siobhan Ng              | 00055  | 17                | 13               |
| Mexico             | Samuel Rivera           | 00078  | 15                | 10               |
| Denmark            | Lisa Sengelov           | 00087  | 15                | 11               |
| Brazil             | Carlos Dzik             | 00104  | 15                | 8                |
| Brazil             | Fabio Andre Franke      | 00105  | 15                | 13               |
| USA                | Neeraj Agarwal          | 00155  | 15                | 13               |
| France             | Hakim Mahammedi         | 00156  | 15                | 14               |
| United Kingdom     | Santhanam Sundar        | 00145  | 14                | 12               |
| Italy              | Michele Maio            | 00061  | 13                | 13               |
| Denmark            | Steinbjorn Hansen       | 00089  | 13                | 11               |
| Netherlands        | Andre M Bergman         | 00167  | 13                | 12               |
| Italy              | Paolo Ascierito         | 00062  | 12                | 8                |
| Argentina          | Ricardo Santos          | 00094  | 12                | 10               |
| Spain              | Joan Carles             | 00169  | 12                | 10               |
| Romania            | Ciuleanu Tudor Eliade   | 00187  | 12                | 12               |
| Argentina          | Ernesto Korbenfeld      | 00221  | 12                | 12               |
| Belgium            | Thierry Gil             | 00008  | 11                | 10               |
| Mexico             | Pedro Solano            | 00044  | 11                | 10               |
| USA                | Nashat Y Gabrail        | 00146  | 11                | 8                |
| Italy              | Ruggero Ridolfi         | 00191  | 11                | 10               |
| Spain              | SUSAna Hernando         | 00238  | 11                | 9                |
| Brazil             | Markus Gifoni           | 00066  | 10                | 6                |
| Peru               | Alejandro Figueroa      | 00084  | 10                | 8                |
| Czech Republic     | Jana Katolicka          | 00166  | 10                | 9                |
| United Kingdom     | Sanjay Dixit            | 00181  | 10                | 8                |
| Chile              | Francisco Orlandi       | 00230  | 10                | 7                |
| Germany            | Jochen Gleissner        | 00001  | 9                 | 8                |
| USA                | Peter J Van Veldhuizen  | 00037  | 9                 | 6                |
| Russian Federation | Vsevolod Matveev        | 00072  | 9                 | 6                |
| Hungary            | Istvan Bodrogi          | 00133  | 9                 | 9                |
| Chile              | Eduardo Yanez           | 00147  | 9                 | 9                |

| Country            | Investigator                 | Site # | Subjects Enrolled | Subjects Treated |
|--------------------|------------------------------|--------|-------------------|------------------|
| USA                | Russell Szmulewitz           | 00034  | 8                 | 6                |
| USA                | James Wade                   | 00040  | 8                 | 7                |
| Germany            | Frank Lohr                   | 00059  | 8                 | 7                |
| Italy              | Eugenio Villa                | 00064  | 8                 | 8                |
| Brazil             | Johnny Camargo               | 00070  | 8                 | 7                |
| Denmark            | Lise Bentzen                 | 00074  | 8                 | 6                |
| Argentina          | Luis Enrique Fein            | 00096  | 8                 | 6                |
| USA                | Scott T Tagawa               | 00178  | 8                 | 7                |
| USA                | Chien-Shing Chen             | 00183  | 8                 | 6                |
| Germany            | Sebastian Rogenhofer         | 00199  | 8                 | 7                |
| Argentina          | Juan Ignacio Hernandez Moran | 00220  | 8                 | 7                |
| Argentina          | Luis Alberto Kaen            | 00229  | 8                 | 7                |
| Australia          | Vinod Ganju                  | 00052  | 7                 | 6                |
| Australia          | Phillip Parente              | 00053  | 7                 | 4                |
| Brazil             | Felipe Cruz                  | 00069  | 7                 | 5                |
| USA                | Manuel R Modiano             | 00086  | 7                 | 4                |
| Chile              | Hans Harbst                  | 00113  | 7                 | 7                |
| Spain              | Rafael Lopez                 | 00118  | 7                 | 2                |
| Russian Federation | Oleg Karyakin                | 00206  | 7                 | 6                |
| Brazil             | Daniel Grabarz               | 00217  | 7                 | 6                |
| France             | Antoine Thiery-Vuillemin     | 00226  | 7                 | 5                |
| USA                | Julio J Hajdenberg           | 00012  | 6                 | 4                |
| Italy              | Alessandro Bertolini         | 00063  | 6                 | 3                |
| Brazil             | Alessandra Notari            | 00065  | 6                 | 3                |
| Brazil             | Carlos Henrique Barrios      | 00067  | 6                 | 3                |
| Russian Federation | Mikhail Biakhov              | 00073  | 6                 | 4                |
| Russian Federation | Alexander Nosov              | 00101  | 6                 | 4                |
| USA                | Ari Baron                    | 00119  | 6                 | 5                |
| Spain              | Enrique Gallardo             | 00121  | 6                 | 4                |
| Romania            | Doina Elena Ganea            | 00130  | 6                 | 5                |
| Romania            | Bacanu Florin                | 00132  | 6                 | 6                |
| Brazil             | Angelica Nogueira Rodrigues  | 00143  | 6                 | 2                |
| Mexico             | Henry Duran                  | 00198  | 6                 | 4                |
| Chile              | Pablo Gonzalez Mella         | 00215  | 6                 | 4                |
| USA                | Laurent Gressot              | 00264  | 6                 | 5                |
| Belgium            | Denis Schallier              | 00019  | 5                 | 2                |

| <b>Country</b> | <b>Investigator</b>        | <b>Site #</b> | <b>Subjects Enrolled</b> | <b>Subjects Treated</b> |
|----------------|----------------------------|---------------|--------------------------|-------------------------|
| USA            | Hassan H Ghazal            | 00038         | 5                        | 5                       |
| USA            | Padmanee Sharma            | 00071         | 5                        | 5                       |
| Mexico         | Hector Gonzalez            | 00080         | 5                        | 5                       |
| Denmark        | Gedske Daugaard            | 00088         | 5                        | 4                       |
| Czech Republic | Jiri Petera                | 00102         | 5                        | 5                       |
| Denmark        | Mats Holmberg              | 00110         | 5                        | 4                       |
| USA            | Mohamad Khasawneh          | 00126         | 5                        | 5                       |
| Hungary        | Bela Piko                  | 00134         | 5                        | 4                       |
| USA            | Charles Drake              | 00159         | 5                        | 4                       |
| USA            | Viran Roger Holden         | 00209         | 5                        | 4                       |
| Argentina      | Felipe Salvador Palazzo    | 00246         | 5                        | 3                       |
| USA            | Troy Guthrie Jr.           | 00010         | 4                        | 3                       |
| USA            | William R Clark            | 00047         | 4                        | 2                       |
| Puerto Rico    | Hector Velez               | 00077         | 4                        | 3                       |
| Mexico         | Jose Manuel Tello          | 00079         | 4                        | 3                       |
| Argentina      | Marcelo Tatangelo          | 00090         | 4                        | 2                       |
| Argentina      | Carlos Medina              | 00112         | 4                        | 2                       |
| Ireland        | Ray Mcdermott              | 00161         | 4                        | 2                       |
| Canada         | Fred Saad                  | 00190         | 4                        | 3                       |
| Mexico         | German Castelazo Rico      | 00193         | 4                        | 3                       |
| Argentina      | Monica Rondinon            | 00210         | 4                        | 4                       |
| France         | Marjorie Baciuchka-Palmaro | 00225         | 4                        | 3                       |
| Greece         | Eleni Efstathiou           | 00245         | 4                        | 1                       |
| Colombia       | Manuel Gonzalez            | 00269         | 4                        | 3                       |
| Hungary        | Zoltan Volgyi              | 00272         | 4                        | 4                       |
| Spain          | Jose Cervera Grau          | 00276         | 4                        | 3                       |
| Austria        | Felix Sedlmayer            | 00003         | 3                        | 2                       |
| USA            | Christopher Hagenstad      | 00024         | 3                        | 2                       |
| USA            | Alexander Hantel           | 00036         | 3                        | 3                       |
| USA            | Fadi Estephan              | 00048         | 3                        | 2                       |
| Canada         | Catherine Sperlich         | 00056         | 3                        | 3                       |
| Argentina      | Eduardo Richardet          | 00091         | 3                        | 2                       |
| Hungary        | Gabor Pajkos               | 00135         | 3                        | 2                       |
| USA            | Daniel Vaena               | 00136         | 3                        | 3                       |
| USA            | Jeffrey George             | 00140         | 3                        | 2                       |
| Ireland        | John A Mccaffrey           | 00168         | 3                        | 2                       |
| Colombia       | Ricardo Schlesinger        | 00184         | 3                        | 3                       |
| Germany        | Frank Koenig               | 00192         | 3                        | 2                       |
| Peru           | Claudia Lozada             | 00218         | 3                        | 3                       |

| <b>Country</b>     | <b>Investigator</b>    | <b>Site #</b> | <b>Subjects Enrolled</b> | <b>Subjects Treated</b> |
|--------------------|------------------------|---------------|--------------------------|-------------------------|
| United Kingdom     | Saad Tahir             | 00219         | 3                        | 2                       |
| USA                | Murthy V.S Andavolu    | 00240         | 3                        | 2                       |
| France             | Pascal Blanchet        | 00242         | 3                        | 3                       |
| Peru               | Jorge Becerra Giraldez | 00244         | 3                        | 2                       |
| Israel             | Eliahu Gez             | 00253         | 3                        | 2                       |
| Israel             | Raanan Berger          | 00254         | 3                        | 3                       |
| USA                | Brendan Curti          | 00011         | 2                        | 2                       |
| Belgium            | Jean-Pascal Machiels   | 00021         | 2                        | 2                       |
| USA                | Ray D Page             | 00030         | 2                        | 2                       |
| USA                | Sanjiv S. Agarwala     | 00046         | 2                        | 1                       |
| USA                | Stephen P Kahanic      | 00051         | 2                        | 2                       |
| Germany            | Peter Staib            | 00058         | 2                        | 1                       |
| USA                | Mary-Ellen Taplin      | 00099         | 2                        | 2                       |
| USA                | Raymond J Vivacqua     | 00103         | 2                        | 1                       |
| Spain              | Miguel Climent         | 00117         | 2                        | 2                       |
| USA                | Andrew Liman           | 00129         | 2                        | 1                       |
| United Kingdom     | Ananya Choudhury       | 00144         | 2                        | 2                       |
| Poland             | Sergiusz Nawrocki      | 00162         | 2                        | 0                       |
| USA                | Ali R Golshayan        | 00170         | 2                        | 2                       |
| USA                | Tanya Dorff            | 00172         | 2                        | 2                       |
| United Kingdom     | John Staffurth         | 00173         | 2                        | 2                       |
| USA                | William R Berry        | 00189         | 2                        | 1                       |
| Italy              | Ruggero Ridolfi        | 00196         | 2                        | 2                       |
| USA                | Leslie Oleksowicz      | 00200         | 2                        | 2                       |
| Australia          | Arun Azad              | 00201         | 2                        | 2                       |
| USA                | Mark Scholz            | 00207         | 2                        | 2                       |
| USA                | John Migas             | 00211         | 2                        | 0                       |
| Argentina          | Emilio Batagelj        | 00216         | 2                        | 2                       |
| Israel             | Avivit Peer            | 00251         | 2                        | 2                       |
| Argentina          | Norma Pilnik           | 00273         | 2                        | 2                       |
| USA                | Barry C Mirtsching     | 00018         | 1                        | 1                       |
| Belgium            | Filip Van Aelst        | 00020         | 1                        | 1                       |
| USA                | Marsha Fink            | 00045         | 1                        | 1                       |
| USA                | SUSAn F Slovin         | 00049         | 1                        | 1                       |
| Peru               | Milagros Caverro       | 00085         | 1                        | 1                       |
| Argentina          | Gonzalo Giornelli      | 00093         | 1                        | 1                       |
| Peru               | Milagros Huaranga      | 00097         | 1                        | 1                       |
| Russian Federation | Sergey Ivanov          | 00100         | 1                        | 1                       |
| USA                | Joseph Beck            | 00142         | 1                        | 0                       |

| <b>Country</b> | <b>Investigator</b>    | <b>Site #</b> | <b>Subjects Enrolled</b> | <b>Subjects Treated</b> |
|----------------|------------------------|---------------|--------------------------|-------------------------|
| Brazil         | Marcelo Oliveira       | 00153         | 1                        | 1                       |
| Ireland        | John A Mccaffrey       | 00160         | 1                        | 0                       |
| USA            | Gregory A Daniels      | 00202         | 1                        | 1                       |
| Peru           | Silvia Neciosup        | 00205         | 1                        | 1                       |
| USA            | Mark Gregory Goldstein | 00234         | 1                        | 0                       |
| Mexico         | Luis Alfonso Adel      | 00249         | 1                        | 0                       |
| Israel         | Wilmosh Mermershtain   | 00252         | 1                        | 1                       |
| Israel         | Avishay Sella          | 00262         | 1                        | 1                       |
| Czech Republic | Vera Hejzlarova        | 00267         | 1                        | 1                       |
